# Supplementary material
Source: PubMed Central journal article supplement (PMC2749580)

**Supplemental Table and Figures**

**Selective Killing Of Malignant Cancer Cells By Suppression Of Geminin  
Activity**

Wenge Zhu and Melvin L. DePamphilis<sup>1</sup>

National Institute of Child Health and Human Development

National Institutes of Health

Building 6/3A-02

9000 Rockville Pike

Bethesda, MD 20892-2753

## SUPPLEMENTAL TABLE

**Table SI.** Human cell lines used in this study

| <b>Human Cell Line</b> | <b>Source</b> | <b>Derivation</b>                                                                    | <b>Morphology</b>                                |
|------------------------|---------------|--------------------------------------------------------------------------------------|--------------------------------------------------|
| CCD-841 CoN            | CRL-1790      | normal colon from human fetus<br>(21 weeks gestation)                                | adherent<br>epithelial                           |
| FHC                    | CRL-1831      | normal colon from human fetus<br>(13 weeks gestation)                                | adherent<br>epithelial                           |
| HCT-116                | CCL-247       | colorectal carcinoma                                                                 | adherent<br>epithelial                           |
| SW480                  | CCL-228       | colorectal adenocarcinoma                                                            | adherent<br>epithelial                           |
| COLO 320DM             | CCL-220       | colorectal adenocarcinoma                                                            | Adherent &<br>suspension<br>Rounded & retractile |
| DLD-1                  | CCL-221       | colorectal adenocarcinoma                                                            | adherent<br>epithelial                           |
| AG11132                | NIACR*        | normal breast tissue from 16 year old girl,<br>fail to divide after ~20–25 passages  | adherent epithelial                              |
| AG11134                | NIACR*        | normal breast tissue from 28 year old woman,<br>fail to divide after ~20–25 passages | adherent epithelial                              |
| MCF-10A                | CRL-10317     | non-tumorigenic mammary gland                                                        | adherent<br>epithelial                           |
| MCF7                   | HTB-22        | mammary gland adenocarcinoma                                                         | adherent<br>epithelial                           |
| WI-38                  | CCL-75        | normal lung fibroblasts from human fetus<br>(3 months gestation)                     | adherent<br>fibroblast                           |
| H1299                  | CRL-5803      | non-small lung carcinoma (p53-)                                                      | adherent<br>epithelial                           |
| 293T                   | CRL-11268     | normal embryonic kidney,<br>later immortalized with SV40 T-ag                        | adherent<br>epithelial                           |
| 786-O                  | CRL-1932      | kidney renal cell adenocarcinoma                                                     | adherent<br>epithelial                           |
| hFOB 1.19              | CRL-11372     | normal osteoblast,<br>later immortalized with SV40 T-ag                              | adherent                                         |
| U-2 OS                 | HTB-96        | osteosarcoma                                                                         | adherent<br>epithelial                           |

|          |          |                                       |                        |
|----------|----------|---------------------------------------|------------------------|
| U-87 MG  | HTB-14   | glioblastoma                          | adherent<br>epithelial |
| T98G     | CRL-1690 | glioblastoma                          | adherent<br>fibroblast |
| D-1      |          | normal dermal fibroblast              | adherent               |
| K-1      |          | normal epidermal keratinocytes        | adherent               |
| WM-266-4 | CRL-1676 | metastatic site of malignant melanoma | adherent<br>epithelial |
| A375     | CRL-1619 | metastatic site of malignant melanoma | adherent<br>epithelial |
| HeLa     | CCL-2    | adenocarcinoma of cervix              | adherent<br>epithelial |

\* National Institute of Aging Cell Repository, Coriell Institute for Medical Research. All other cells were obtained from the American Type Culture Collection.

## SUPPLEMENTAL FIGURES

**Figures S1 - S5.** Depletion of geminin in cancer and normal cells. The indicated cells were transfected with siRNA directed against either firefly luciferase (siGL2) or human geminin (siGem). At 48 hours post-transfection, cells were harvested and stained either with propidium iodide to quantify their DNA content by fluorescence activated flow cytometry (FACS) analysis, or with DAPI to visualize their nuclei by fluorescence microscope. The percentage of cells with greater than 4N DNA content is indicated in the FACS profiles. The percentage of cells with giant nuclei (diameter greater than twice that of nuclei in siGL2 treated cells) is indicated in the fluorescence microscopic images. Geminin, GAPDH and actin proteins were detected by Western immuno-blotting of samples in the same gel.

**Figure S6.** Phase contrast images of HCT116 cells 4 days after transfection with either siGem or siGL2. Giant cells that have rounded up and detached from the dish are indicated by red arrows, and those undergoing apoptosis (i.e. blebbing) are indicated by blue arrows. Both images were taken at the same magnification.

**Figure S7.** Depletion of geminin by three different siRNAs against geminin leads to DNA re-replication in HCT116 cells but not in HeLa and D-1 cells. HCT116, HeLa or D-1 cells were transfected with three different siRNAs against geminin ( siGem, siGem2 and siGem3) as described in experimental procedures. At 48 hours post-transfection, cells were harvested for FACS analysis or western immuno-blotting of samples in the same gel.

**Figure S8.** Cell sensitivity to siGem was not related to cellular levels of geminin protein. (A) Asynchronously proliferating populations of the indicated cells were subjected to Western immuno-blotting analysis for the indicated proteins. N, normal cells. C, cancer cells. (B) FACS analysis to determine the fraction of proliferating cells (S+G2+M phases) as shown in (A).

## REFERENCES

1. Zhu W, Chen Y, Dutta A. Rereplication by depletion of geminin is seen regardless of p53 status and activates a G2/M checkpoint. *Mol Cell Biol* 2004;24:7140-50.
2. Zhu W, Dutta A. An ATR- and BRCA1-mediated Fanconi anemia pathway is required for activating the G2/M checkpoint and DNA damage repair upon rereplication. *Mol Cell Biol* 2006;26:4601-11.
3. Tachibana KE, Gonzalez MA, Guarguaglini G, Nigg EA, Laskey RA. Depletion of licensing inhibitor geminin causes centrosome overduplication and mitotic defects. *EMBO Rep* 2005;6:1052-7.

Figure S1 (Zhu & DePamphilis)

AG11132

siGL2

siGem

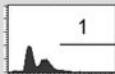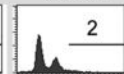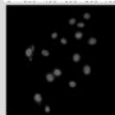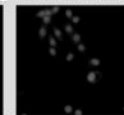

siGL2 siGem

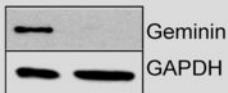

AG11134

siGL2

siGem

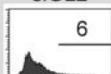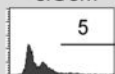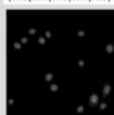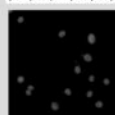

siGL2 siGem

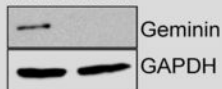

MCF10A

siGL2

siGem

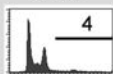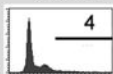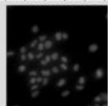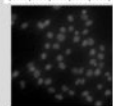

siGL2 siGem

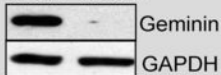

MCF7

siGL2

siGem

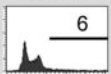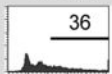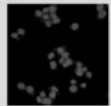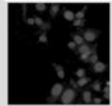

siGL2 siGem

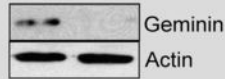

Figure S2 (Zhu & DePamphilis)

H1299

siGL2

siGem

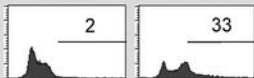

2

33

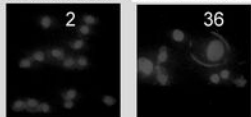

siGL2 siGem

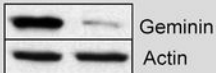

WI-38

siGL2

siGem

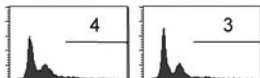

4

3

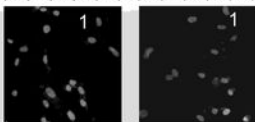

siGL2 siGem

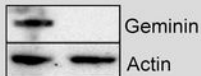

786-O

siGL2

siGem

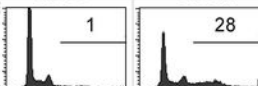

1

28

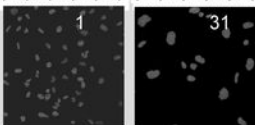

siGL2 siGem

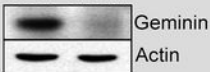

hFOB 1.19

siGL2

siGem

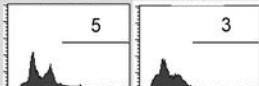

5

3

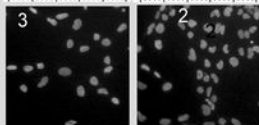

siGL2 siGem

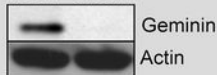

Figure S3 (Zhu & DePamphilis)

T98G

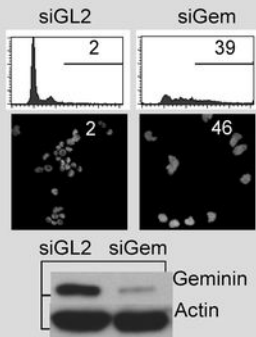

U-87 MG

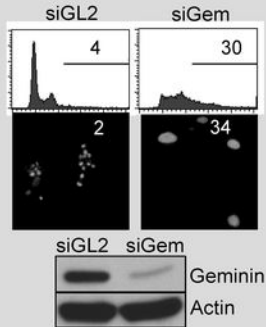

DLD-1

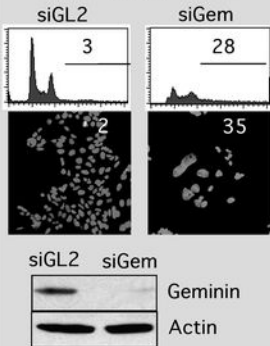

COLO 320 DM

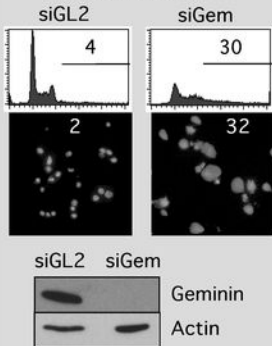

Figure S4 (Zhu & DePamphilis)

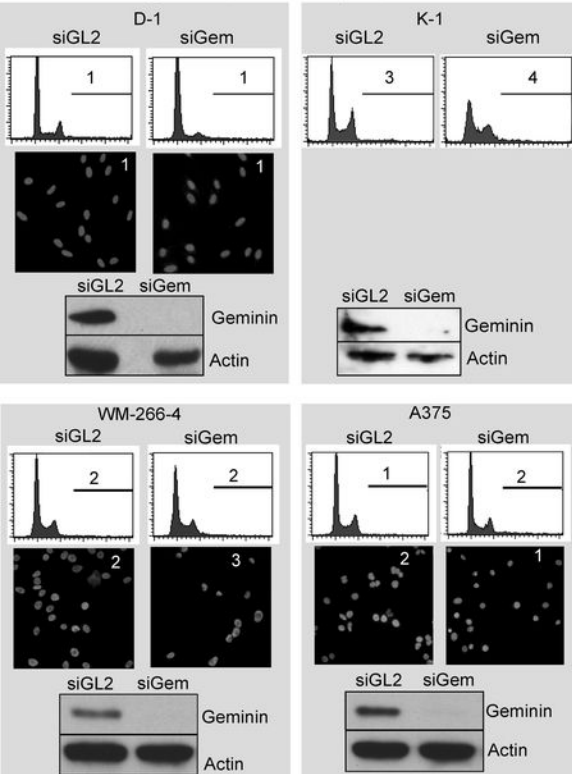



Figure S5 (Zhu & DePamphilis)

HeLa

siGL2

siGem

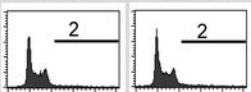

siGL2 siGem

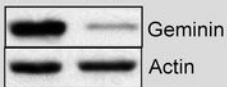

293T

siGL2

siGem

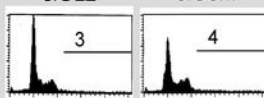

siGL2 siGem

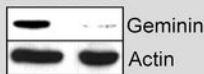

U2OS

siGL2

siGem

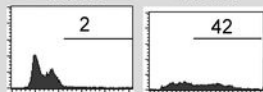

siGL2 siGem

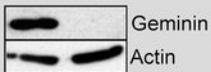

Figure S6 (Zhu & DePamphilis)

siGL2

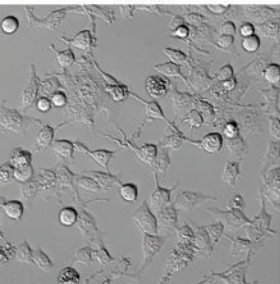

siGem

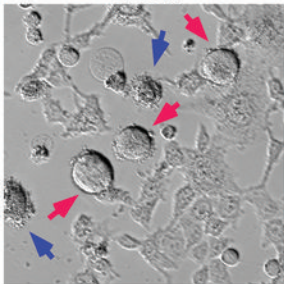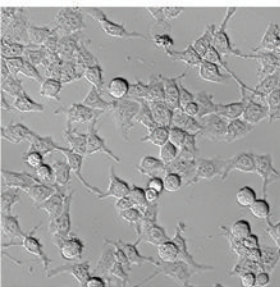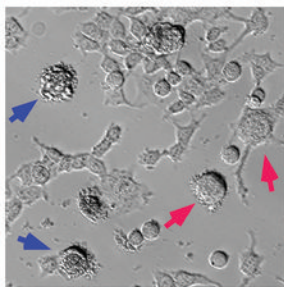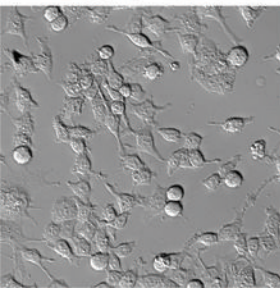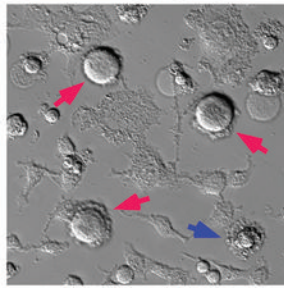

Figure S7 (Zhu & DePamphilis)

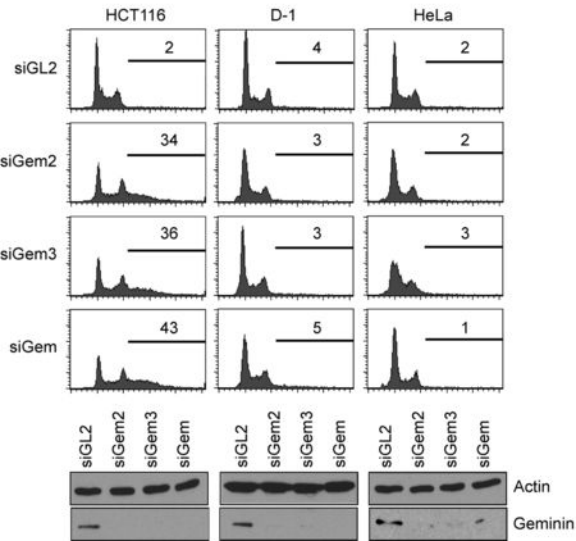

Figure S8 (Zhu & DePamphilis)

(A)

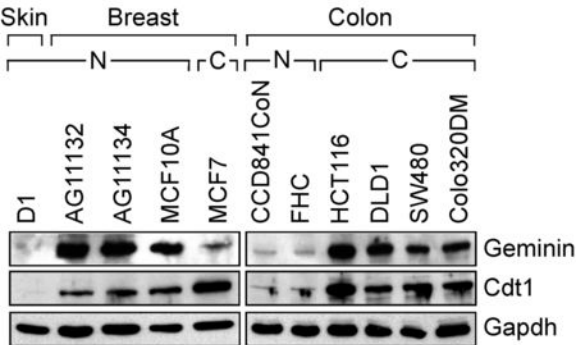

(B)

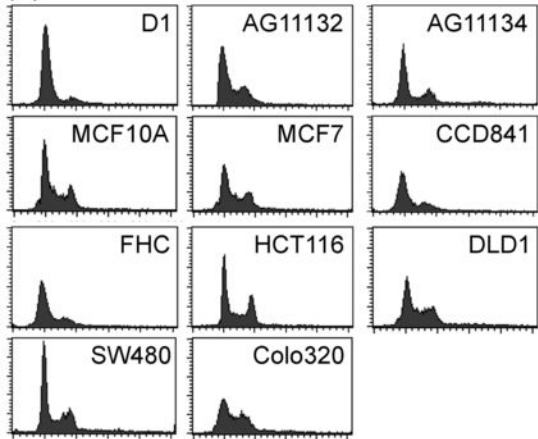

Supplement: NIHMS107950-supplement-Supplement.pdf [file NIHMS107950-supplement-Supplement.pdf]
